1 Gender-affirming care, mental health, and economic stability in  
2 the time of COVID-19: a global cross-sectional study of  
3 transgender and non-binary people  
4  
5

6 Brooke A. Jarrett<sup>1</sup>, Sarah M. Peitzmeier<sup>2</sup>, Arjee Restar<sup>1</sup>, Tyler Adamson<sup>3</sup>, Sean Howell<sup>4</sup>,  
7 Stefan Baral<sup>1</sup>, S. Wilson Beckham<sup>5</sup>  
8

9 <sup>1</sup> Department of Epidemiology; Bloomberg School of Public Health,  
10 Johns Hopkins University

11 <sup>2</sup> Department of Health Behavior and Biological Sciences; School of Nursing;  
12 University of Michigan

13 <sup>3</sup> Department of Health, Policy, and Management; Bloomberg School of Public Health;  
14 Johns Hopkins University

15 <sup>4</sup> Hornet; San Francisco, CA, USA

16 <sup>5</sup> Department of Health, Behavior, and Society; Department of International Health;  
17 Bloomberg School of Public Health; Johns Hopkins University  
18  
19  
20

21 **CORRESPONDENCE**

22 Brooke A. Jarrett: brooke [at] jhmi [dot] edu  
23

24 **FUNDING**

25 BAJ was supported by the National Institute of Mental Health (grant F31MH121128).  
26 AJR was supported by the National Institute of Allergy and Infectious Diseases  
27 (grant T32AI102623). SWB was supported by the National Institute of Mental Health  
28 (grant K01MH114715) and also receives funding from Viiv Healthcare. The funders had no role  
29 in study design, data collection and analysis, decision to publish, or preparation of the  
30 manuscript.  
31

32 **DISCLOSURES**

33 The authors have declared that no competing interests exist.  
34

35 **KEYWORDS**

36 Transgender persons; health services for transgender persons; mental health services; social  
37 determinants of health; pandemics; COVID-19  
38

39 **WORD COUNTS**

40 Abstract: 300

41 Text: 4,517

42 Tables: 5

16 **ABSTRACT**

17

18 **Background**

19 Transgender and non-binary people are disproportionately burdened by barriers to quality  
20 healthcare, mental health challenges, and economic hardship. This study examined the impact  
21 of the novel coronavirus disease (COVID-19) pandemic and subsequent control measures on  
22 gender-affirming care, mental health, and economic stability among transgender and non-binary  
23 people globally.

24

25 **Methods**

26 We collected global cross-sectional data from 964 transgender and non-binary adult users of  
27 the Hornet and Her apps from April to August 2020 to characterize changes in gender-affirming  
28 care, mental health, and economic stability as a result of the COVID-19 pandemic. We  
29 conducted Poisson regression models to assess if access to gender-affirming care and ability to  
30 live according to one's gender were related to depressive symptoms, anxiety, and changes in  
31 suicidal ideation.

32

33 **Results**

34 Individuals resided in 76 countries, including Turkey (27.4%,n=264/964) and Thailand  
35 (20.6%,n=205). A majority were non-binary (66.8%,n=644) or transfeminine (29.4%,n=283).  
36 Due to the COVID-19 pandemic, 55.0% (n=320/582) reported reduced access to gender-  
37 affirming resources, and 38.0% (n=327/860) reported reduced time lived according to their  
38 gender. About half screened positive for depression (50.4%,442/877) and anxiety  
39 (45.8%,n=392/856). One in six (17.0%,n=112/659) expected losses of health insurance, and  
40 77.0% (n=724/940) expected income reductions. The prevalence of depressive symptoms,  
41 anxiety, and increased suicidal ideation were 1.63 (95% CI: 1.36-1.97), 1.61 (95% CI: 1.31-  
42 1.97), and 1.74 (95% CI: 1.07-2.82) times higher for individuals whose access to gender-  
43 affirming resources was reduced versus not.

44

45 **Discussion**

46 The COVID-19 pandemic has reduced access to gender-affirming resources and the ability of  
47 transgender and non-binary people to live according to their gender worldwide. These  
48 reductions may drive the increased depressive symptoms, anxiety, and suicidal ideation  
49 reported in this sample. To improve transgender and non-binary health globally, increased  
50 access to gender-affirming resources should be achieved through policies (e.g., digital  
51 prescriptions), flexible interventions (e.g., telehealth), and support for existing transgender  
52 health initiatives.

## 53 **INTRODUCTION**

54 The global pandemic caused by the SARS-CoV-2 virus has resulted in more than 37 million  
55 cases of novel coronavirus disease (COVID-19) and over one million deaths.<sup>1</sup> In response,  
56 countries have implemented a wide range of measures to quell its spread — shelter-in-place  
57 orders, closures of business and schools, and the cancellation of surgeries perceived to be  
58 elective.<sup>2</sup> While these interventions are focused on reducing COVID-19 cases and increasing  
59 healthcare capacity, they have also negatively affected healthcare access, mental health, and  
60 economic stability worldwide.<sup>3–6</sup>

61  
62 A growing body of literature describes global interruptions to prescriptions for diseases like HIV,  
63 increases in depression, and significant losses of job, insurance, and food security as a result of  
64 the COVID-19 pandemic.<sup>7–11</sup> However, recent work has demonstrated that these effects  
65 disproportionately burden groups that have been historically marginalized. Specifically,  
66 pandemic control measures have exacerbated existing health disparities and social inequities  
67 along lines of poverty and occupation, race and ethnicity, and sexual orientation.<sup>12–16</sup> The  
68 COVID-19 pandemic may also uniquely affect transgender and non-binary people.

69  
70 Prior to the COVID-19 pandemic, transgender and non-binary individuals experienced barriers  
71 to care, greater mental health challenges, and economic vulnerabilities caused by stigma,  
72 discrimination, and minority stress.<sup>17–19</sup> Transgender and non-binary populations face a scarcity  
73 of clinicians trained in gender-affirming practices and widespread transphobia among healthcare  
74 staff, both of which make healthcare less accessible.<sup>20–22</sup> Yet access to gender-affirming  
75 healthcare (e.g., chest/breast surgery), services (e.g., hair removal), and goods (e.g., binders  
76 and packers) can substantially improve the quality of life and mental health of transgender and  
77 non-binary populations, who frequently have elevated levels of depression, anxiety, and suicidal  
78 ideation.<sup>23–26</sup> A disproportionate number of transgender and non-binary individuals also  
79 experience structural vulnerabilities, such as economic, food, and housing insecurity, that can  
80 reinforce or worsen barriers to gender-affirming resources and mental health counseling.<sup>27,28</sup>

81  
82 The COVID-19 pandemic is exacerbating these risks among transgender and non-binary  
83 individuals. For example, there have been documented cancellations and delays in gender-  
84 affirming surgeries;<sup>29</sup> such delays and cancellations have previously been connected to  
85 negative mental health consequences.<sup>23,30</sup> Furthermore, many transgender and non-binary  
86 individuals who were living according to their gender prior to the COVID-19 pandemic have had  
87 to return to living according to their sex assigned at birth upon moving in with relatives.<sup>31</sup>  
88 Researchers have also reported on gendered policies from Panama, Peru, and Columbia that  
89 attempted to reduce the density of crowds in public places by requiring women and men to  
90 access essential services on alternating days — a policy that, like other gender-based laws,  
91 would likely result in violence against transgender communities.<sup>32</sup> In these situations,  
92 transgender and non-binary individuals may be limited in their ability to live safely and  
93 comfortably as themselves. The impact of the COVID-19 pandemic is likely to be especially  
94 adverse for those who are already economically marginalized, occupying other marginalized

95 identities (e.g., people who are racial or ethnic minorities, living with HIV, or living with  
96 disabilities), or both.

97  
98 Of the studies to date about the impact of COVID-19 on transgender and non-binary individuals,  
99 a majority have been conducted in a single country like the United States and focused on  
100 measuring a narrow spectrum of indicators. The objective of this study was to describe the  
101 global impact of the COVID-19 pandemic and subsequent control measures on gender-affirming  
102 care, mental health, and economic stability among transgender and non-binary individuals. We  
103 also examined the association between reduced access to gender-affirming care and ability to  
104 live according to one's gender with multiple mental health indicators.

## 105 **METHODS**

### 106 **Study Design and Participants**

107 For this cross-sectional study, we used data from the global COVID-19 Disparities Survey  
108 distributed between April 16 and August 3, 2020 via Hornet and Her — social networking apps  
109 marketed to sexual minorities, both cisgender and transgender. We sent survey invitations to  
110 the app-specific inboxes of all users who had been active on their app for at least one year. To  
111 take the survey, individuals had to report being 18 years or older, view a consent form, and  
112 indicate their informed consent by clicking a button to begin.

113  
114 A total of 24,618 individuals began the survey. For these analyses, we included 1,285  
115 transgender and non-binary adults, which we defined as people 18 years or older who self-  
116 reported being transgender, non-binary, or a gender different than their sex assigned at birth.  
117 We excluded all women assigned female or intersex at birth (n=161), all men assigned male or  
118 intersex at birth (n=12,740), individuals who did not report a gender (n=9,751), individuals who  
119 only reported not knowing, not wishing to disclose, or being unable to disclose their gender  
120 (n=654), and non-transgender identifying men and women who did not report an assigned sex  
121 at birth (n=27).

122  
123 To ensure the quality of our study population, we screened for duplicate survey responses  
124 based on IP address, and again by searching for identical responses to twenty randomly  
125 selected variables but found none. We also excluded individuals who completed 89% or less of  
126 the survey (n=271), who finished in less than the minimum piloted time of seven minutes (n=47),  
127 or provided conflicting responses for multiple questions (n=3) for a final sample size of 964. The  
128 Johns Hopkins School of Public Health Institutional Review Board provided a Category 4  
129 exemption to the larger survey prior to distribution.

### 130 131 **Demographic Measures**

132 Individuals self-reported gender by choosing any number of the following options: woman, man,  
133 transgender man, transgender woman, or non-binary (including gender-diverse, genderqueer,  
134 gender nonconforming, gender expansive, and agender). They also self-reported their country  
135 of residence, age, socioeconomic status, years of education, ethnic minority and immigration  
136 status, access to masks during the COVID-19 pandemic, and whether the government in their  
137 area had ever imposed confinement orders (e.g., mobility restrictions to stay-at-home). We  
138 categorized countries according to regions defined by the World Health Organization.

139  
140 We used eight mutually exclusive categories to describe reported genders. To increase the  
141 power for our analyses, we then collapsed individuals into three groups, building on  
142 recommendations from Reisner et al: (1) transmasculine, i.e., people who were assigned female  
143 at birth (AFAB) or intersex who self-reported being transgender or being a man; (2)  
144 transfeminine, i.e., people who were assigned male at birth (AMAB) or intersex who self-  
145 reported being transgender or being a woman; and (3) non-binary, i.e., individuals who reported

146 being either solely non-binary, both a man and a woman, or a transgender man and  
147 transgender woman.

148  
149 We chose to operationalize three gender categories for multiple reasons. First, while some non-  
150 binary individuals explicitly reported also being transgender, the majority did not. We wanted to  
151 honor this distinction while also allowing for individuals who reported being both men and  
152 women to transcend the transfeminine versus transmasculine binary. Second, our survey  
153 presented a limited number of gender options to a global audience in which being a third gender  
154 (e.g., two-spirit, bissu, fa'afafine, qariwarmi) is distinct from many Western concepts of being  
155 transgender<sup>33</sup>. Lastly, in line with recommendations from Restar et al., we saw statistically  
156 significant differences when comparing non-binary individuals with transmasculine and  
157 transfeminine individuals<sup>34</sup>. Therefore, presenting results stratified by gender (i.e., a “gender-  
158 specific” approach) was more appropriate than conducting analyses on all individuals together  
159 and presenting them as a single population (i.e., a “gender-inclusive” approach).

160

### 161 **COVID-19 Impact Measures**

162 Individuals answered questions about the impact of the COVID-19 pandemic and the resulting  
163 response on their access to gender-affirming resources, their mental health, and their economic  
164 stability. For indicators related to gender-affirming resources, we asked those who self-identified  
165 as transgender or non-binary (n=865) whether the COVID-19 pandemic limited their access to  
166 the following: hormone therapy and/or medications; surgical aftercare materials (e.g., vaginal  
167 dilators); cosmetic supplies and services (e.g. makeup, wigs, and hair removal); mental health  
168 counseling and therapy services; and body modifiers (e.g., binders and packing materials); to  
169 which they could respond, “Yes,” “No,” or “Not Applicable.” We characterized the severity of  
170 interruptions to gender-affirming care by whether individuals reported that more than one  
171 resource had been impacted. We also asked whether the COVID-19 pandemic had changed the  
172 amount of time that the individual could live according to their gender (“Compared to before the  
173 COVID-19 crisis, how often are you able to live according to your gender identity?”). We  
174 categorized the five-point Likert scale into three categories: More than before (i.e., more or a lot  
175 more as compared to before COVID-19), about the same as before COVID-19, and less than  
176 before (i.e., less than or not at all as compared to before COVID-19).

177

178 For mental health indicators, we used the 4-item patient health questionnaire (PHQ-4) to screen  
179 for common symptoms of depression and anxiety, which we dichotomized with a score of three  
180 or more being considered positive<sup>35</sup>. We assessed the impact of COVID-19 on loneliness  
181 (“Have you been feeling lonely since the COVID crisis began?”) using a four-point Likert Scale,  
182 which we dichotomized into a positive sentiment (“not lonely” or “not much lonely”) and negative  
183 sentiment (“very much lonely” or “a little lonely”). We also asked how often they had thought  
184 about taking their own life presently and in the six months prior to the COVID-19 pandemic with  
185 the following answer options: “never,” “seldom,” “quite often,” “very often,” and “all the time.” We  
186 created four categories to describe changes from pre- to mid-pandemic: was and remains rare  
187 (i.e., “never” or “seldom”), was and remains frequent (i.e., “quite often,” “very often,” or “all the

188 time”), decreased, or increased. To characterize resiliency, we asked about the following in the  
189 face of the COVID-19 pandemic: if they had “sources of hope, strength, comfort, and peace”; if  
190 they were “intent on finding emotional support and therapy for themselves”; and if they believed  
191 that they were able to “live a happy, full life despite the crisis.”

192

### 193 **Statistical Analyses**

194 We conducted descriptive analyses of demographic measures and presented descriptions of  
195 the COVID-19 impact measures stratified by gender, using chi-squared and Fisher’s exact tests  
196 as appropriate. We also stratified results by country in the supplementary materials. We used  
197 Poisson regression models with complete case analyses to assess for differences in the  
198 prevalence of screening positive for depression and anxiety among individuals with reduced  
199 (versus continued) access to gender-affirming resources and individuals who reported being  
200 able to live according to their gender less (versus more) since the COVID-19 pandemic started.  
201 We reported these comparisons as prevalence ratios. We used the same approach to assess  
202 the impact of reductions in access to care and changes in ability to live according to one’s  
203 gender on changes in suicidal ideation, stratified on baseline levels of suicidal ideation. We  
204 conducted all analyses in Stata version 14.<sup>36</sup>

205 **RESULTS**

206 These analyses primarily consisted of non-binary (66.8%, n=644/964) and transfeminine  
207 (29.4%, n=283) individuals (**Table 1**). About 47% (n=451) were from the European region and  
208 25.1% (n=242) were from the South-East Asia region. There were 76 countries represented in  
209 the sample; a majority of individuals were residents of Turkey (27.4%, n=264), Thailand (20.6%,  
210 n=199), and Russia (11.5%, n=117). No other single country accounted for more than 5% of the  
211 sample. Individuals were young and highly educated, with 50.5% (n=487) being between 18 and  
212 29 years old and 42.6% (n=410) having at least a university degree. Few (12.7%, n=122) had  
213 ever lacked access to a mask during the COVID-19 pandemic and 75.6% (n=729) lived in a  
214 country that had issued COVID-related confinement or “stay-at-home” orders.  
215

216 More than half (55%, n=320/582) of the sample reported that the COVID-19 pandemic had  
217 limited their access to one or more gender-affirming resource (**Table 2**). Mental health  
218 counseling and therapy was the most commonly cited resource to be affected (42.9%,  
219 n=192/448), with a somewhat greater proportion of transmasculine individuals reporting reduced  
220 access to counseling (61.9%, n=13/21) than non-binary (43.0%, n=122/284) and transfeminine  
221 (39.9%, n=57/143) individuals (p-value=0.16). Transmasculine and transfeminine individuals  
222 were more likely than non-binary individuals to report that the COVID-19 pandemic limited their  
223 access to gender-affirming hormones and medications (55.0% [n=11/20] and 42.1% [n=61/145]  
224 vs. 30.1% [n=71/236], p-value=0.01) as well as surgical aftercare materials (42.9% [n=6/14]  
225 and 40.2% [n=51/127] vs. 28.8% [n=62/215], p-value=0.08). All geographic regions reported  
226 reductions in access to gender-affirming resources; at least half of the individuals in each  
227 region, beside the Western Pacific, reported reduced access to one or more resource (**S1**  
228 **Table**). More than a third (38.0%, n=327/860) of individuals reported that the COVID-19  
229 pandemic had reduced or completely eliminated their ability to live according to their gender,  
230 with more transfeminine individuals (43.1%, n=100/232) being unable to living according to their  
231 gender as compared to transmasculine (28.6%, n=8/28) and non-binary (36.5%, n=219/600)  
232 individuals (p-value <0.001).  
233

234 About half of the sample screened positive for depression (50.4%, n=442/877) and anxiety  
235 (45.8%, n=392/856), with a larger proportion of transfeminine individuals reporting these  
236 outcomes than transmasculine and non-binary individuals (**Table 3**). Overall, 10.0% (n=93/928)  
237 reported that suicidal ideation had increased during the COVID-19 pandemic, and 12.5%  
238 (n=116) reported that it had decreased. Transfeminine individuals were more likely to report  
239 increases in suicidal ideation (11.6%, n=31/263) while being less likely to agree with statements  
240 of resiliency, such as having sources of hope, strength, comfort, and peace (47.9%, n=100/209)  
241 when contrasted with transmasculine (8.3%, n=3/36; 71.0%, n=22/31) and non-binary (9.5%,  
242 n=59/624; 69.5%, n=367/528) individuals (p-value=0.98; p-value < 0.001). Sixteen percent  
243 (n=136/851) of individuals reported that they were not intent on finding emotional support and  
244 therapy for themselves during the COVID-19 pandemic. Seventy-seven percent (n=724/940) of  
245 the sample expected a reduction in their income, 17% (n=112/659) expected to lose health



246 insurance, and 53.4% (n=428/801) reported not having received financial aid, despite need  
247 (**Table 4**). Though 40% (n=361/900) of individuals overall reported cutting or reducing their  
248 meals, fewer non-binary individuals had done so (34.9% [n=212/607] versus 51.4% [n=18/35] of  
249 transmasculine individuals and 50.8% [n=131/258] of transfeminine individuals).

250  
251 A positive screen for depression was 1.63 (95% confidence interval [CI]: 1.36-1.97) times more  
252 common among those who had lost access to one or more gender-affirming resource during the  
253 COVID-19 pandemic as compared to those without reductions in access (**Table 5**). Similarly, a  
254 positive screen for anxiety was 1.61 (95% CI: 1.31-1.97) times more common among those who  
255 had lost access to one or more gender-affirming resource compared to those without reductions  
256 in access. Trends were similar for suicidal ideation. For example, among those with rare or no  
257 suicidal ideation at the beginning of the COVID-19 pandemic, individuals who had reduced  
258 access to gender-affirming resources were 1.74 (95% CI: 1.07, 2.82) times more likely to report  
259 increased suicidal ideation. Screening positive for depression and anxiety were also 1.21 (95%  
260 CI: 0.92, 1.58) and 1.48 (95% CI: 1.04, 2.10) times more prevalent among those reporting that  
261 the COVID-19 pandemic had decreased the amount of time they could live according to their  
262 gender, versus those who had increased that time. However, among individuals who had no or  
263 rare suicidal ideation prior to the COVID-19 pandemic, a smaller proportion of those living less  
264 according to their gender during the COVID-19 pandemic had increased suicidal ideation  
265 compared to those who lived more as their gender (prevalence ratio = 0.57 [95% CI: 0.33-  
266 0.98]).  
267

268 **DISCUSSION**

269 This survey provides early insights into the impacts of the COVID-19 pandemic on access to  
270 gender-affirming resources, mental health, and economic stability among transgender and non-  
271 binary communities globally. Roughly half of individuals reported that the COVID-19 pandemic  
272 had restricted their access to gender-affirming resources, and nearly two in five reported the  
273 COVID-19 pandemic had negatively impacted their ability to live according to their gender.  
274 Screening positive for depression and/or anxiety and increases in suicidal ideation were  
275 common, but more so for those who experienced reduced access to gender-affirming  
276 resources. Of these resources, counseling and therapy were the most affected by COVID-19,  
277 but most people who responded to the survey also reported resiliencies, such as having  
278 sources of hope and being intent on finding emotional support. This intent to seek support,  
279 however, may be dampened by the fact that many individuals expected reductions in income  
280 and loss of health insurance. This is the first empirical study to examine the effect of COVID-19  
281 and its impact on gender-affirming resources, mental health, and economic stability among a  
282 global, multi-region sample of transgender and non-binary individuals.

283  
284 Half of the individuals in our survey reported reduced access to one or more gender-affirming  
285 resource. This was higher in our sample than in an online survey of 1,240 transgender and non-  
286 binary individuals in Germany, Switzerland, and Austria.<sup>29</sup> A third or more of individuals from the  
287 European region in our study reported reductions in access to hormone therapy and surgical  
288 aftercare materials, which was higher than the 18% and 3% of individuals from the European-  
289 specific survey respectively. That survey also found about a quarter of individuals had delayed  
290 or cancelled aftercare for a recent surgery. Differences may be due to the populations sampled,  
291 as our survey primarily drew from countries in Eastern Europe where there is substantial stigma  
292 against and policing of transgender individuals. Together, though, these results signify that the  
293 COVID-19 pandemic is causing decreases in access to gender-affirming resources even in  
294 high-income settings.

295  
296 Our study demonstrated that reduced access to gender-affirming resources due to the COVID-  
297 19 pandemic were associated with poorer mental health. Screening positive for depression,  
298 screening positive for anxiety, and increased suicidal ideation were more common for those  
299 whose access to one or more gender affirming resource had been reduced due to the COVID-  
300 19 pandemic. These results mirror anecdotal data from clinics serving transgender patients in  
301 China.<sup>37</sup> Gender-affirming resources are crucial to transgender and non-binary individuals, as  
302 these resources often activate and enhance the interactive process of receiving recognition for  
303 their gender, sense of self, and sense of humanity.<sup>38</sup> Given the abundant literature that gender  
304 affirmation results in better mental health and quality of life, these data underscore the  
305 importance of ensuring that transgender and non-binary individuals have access to these  
306 essential services and products.<sup>23,24,30,39-41</sup> Access to these resources should also be fortified to  
307 avoid negative physical health outcomes. For example, about a third of this sample reported  
308 reductions in access to hormones and 17% reported that they expected to lose their health  
309 insurance, which may support hormone therapy procurement. These disruptions may force

310 some transgender and non-binary individuals to discontinue hormone therapy or mete out their  
311 limited doses to last longer. Sustained interruptions or sub-optimal dosing of hormone therapy  
312 have been connected with symptoms of hypogonadism, such as osteoporosis and  
313 cardiovascular disease.<sup>42</sup> Similarly, aftercare for gender-affirming surgeries is critical for  
314 avoiding negative physical outcomes like urinary tract hesitancy and needing re-operation, yet a  
315 third of individuals in this study reported that they had reduced access to the surgical aftercare  
316 that they needed.<sup>43</sup>

317  
318 A third of individuals reported decreased time lived according to their gender. In comparison, a  
319 poll conducted by the Trevor Project in the United States of 600 lesbian, gay, bisexual,  
320 transgender, and questioning (LGBTQ) youth (13-19 years) reported that 56% of the  
321 transgender and non-binary individuals had reduced their ability to express their LGBTQ identity  
322 due to the COVID-19 pandemic.<sup>44</sup> Youth often attributed needing to move back in with  
323 unsupportive caretakers as a reason for not being able to live according to their gender,<sup>31,44</sup>  
324 which may explain the elevated proportion compared to adults in our study. Living less  
325 according to one's gender during the COVID-19 pandemic was associated with screening  
326 positive for depression and anxiety. However, a counterintuitive result was found among  
327 individuals in our study who had rare suicidal ideation prior to the COVID-19 pandemic and lived  
328 more according to their gender during the COVID-19 pandemic. This subset of the sample was  
329 more likely to have increased suicidal ideation as compared to individuals who were living  
330 according to their gender less. These results, however, may reflect a limitation of our  
331 measurement tool. For example, the former group likely had a low baseline ability to live  
332 according to their gender pre-pandemic and hence could only increase the amount of time lived  
333 according to their gender. The worse mental health in this group may be linked to low pre-  
334 pandemic levels of living according to their gender, rather than the recent increase in their ability  
335 to do so. Because we did not measure pre-pandemic and current ability to live according to  
336 one's gender separately, we could not control for baseline levels in the model. It is also possible  
337 that people who recently began living in their gender more may be subjected to elevated levels  
338 of anticipated and experienced stigma that could be driving increased suicidality; prior research  
339 has shown discrimination due to gender expression, rather than gender identity itself, to be  
340 associated with mental distress.<sup>45-47</sup>

341  
342 Positive screens for depression and anxiety were correlated with decreases in access to  
343 gender-affirming care and decreased time lived according to one's gender, and were present in  
344 nearly half the sample. These data align with results from transgender and non-binary youth  
345 from the Trevor Project poll and another sample of 201 young adults (19-25 years) attending  
346 college, both from the U.S.<sup>44,48</sup> Findings in a small study of 15 Latinx trans women in the United  
347 States suggest that these poor mental health indicators represent declines as a result of the  
348 COVID-19 pandemic rather than just a high baseline prevalence.<sup>49</sup> These findings are  
349 particularly concerning when contrasted against the large proportion of individuals in this and  
350 other studies who reported that COVID-19 had decreased their access to mental health therapy  
351 and counseling.<sup>44,48</sup> To mitigate the immediate trauma of the COVID-19 pandemic and potential

352 long-lasting effects, innovative mental health interventions — from remote video and phone  
353 therapy to self-help apps — have been emerging, but additional investments are needed,  
354 especially to reach those with limited to no access to Internet.<sup>50,51</sup> Furthermore, our findings  
355 support the notion that transmasculine, transfeminine, and non-binary populations are having  
356 distinct experiences during the COVID-19 pandemic and should receive gender-specific  
357 support.<sup>37</sup> For example, transmasculine individuals were more likely to report having reduced  
358 access to gender-affirming resources but generally reported better mental health outcomes, as  
359 well as having sources of strength and comfort. Combined with the fact that transgender and  
360 non-binary youth have been more likely to reach out to friends and family than cisgender  
361 lesbian, gay, and pansexual youth according to the Trevor Project data, it may be possible to  
362 enhance these resiliencies by strengthening and expanding trauma-informed, online peer-to-  
363 peer support efforts such as Q Chat Space<sup>31,44,52</sup>. However, different approaches to  
364 transfeminine, transmasculine, and non-binary individuals may be needed.

365  
366 Lastly, we found that transgender and non-binary communities worldwide are experiencing  
367 strains across basic needs such as finances, food, and health insurance, all as a result of  
368 COVID-19 pandemic. These strains, in addition to pre-existing economic vulnerabilities, will  
369 contribute to even greater barriers to gender-affirming care, mental health counseling, services,  
370 and products.<sup>27</sup> For example, approximately 10% of transgender and non-binary individuals in  
371 the U.S. lacked health insurance before the COVID-19 pandemic.<sup>27</sup> Though some may have  
372 health insurance through their employers, transgender and non-binary people are also more  
373 likely to be employed in the industries most impacted by business shutdowns.<sup>12</sup> We found that  
374 more than three quarters of the sample expected a reduction in their income, one in six  
375 expected to lose their health insurance, and more than half reported needing and not receiving  
376 financial aid. These results display the pronounced structural vulnerabilities that shape  
377 experiences of transgender and non-binary communities in the current context of the COVID-19  
378 pandemic, and likely contribute further as stressors to mental health. These stressors may climb  
379 as transgender and non-binary communities continue to experience worsening economic  
380 instability due to the COVID-19 pandemic and associated control measures. Further research is  
381 necessary to examine the syndemic impact of COVID-19-related stressors on transgender and  
382 non-binary communities, particularly those who are experiencing multiple, intersectional  
383 stressors at the individual, interpersonal, and structural levels.

384  
385 This study had some limitations. While the survey reached individuals from six continents and  
386 was available in 13 languages, these data are not a representative sample of transgender and  
387 non-binary individuals worldwide. As a survey distributed through a mobile app, participation  
388 was limited to individuals with Internet and a smartphone. Individuals in the survey were also  
389 generally highly educated. Our survey likely missed highly disadvantaged individuals, and  
390 consequently, likely underestimates the true magnitude of impact of COVID-19 on this  
391 community. Our study also had a methodological limitation in its categorization of genders  
392 — while we aimed to offer an inclusive set of options, we did not capture the full spectrum nor  
393 fluidity of genders across the cultural diversity of the countries represented. Yet, our sample

394 does present results from a large number of non-binary individuals, which is a population that  
395 has generally been understudied but increasingly recognized as distinct from binary transgender  
396 individuals.<sup>53</sup> Furthermore, the survey only presented questions about access to gender-  
397 affirming resources to individuals who self-identified as transgender (e.g., versus those who  
398 selected being a man and were AFAB but did self-report as transgender). The next wave of data  
399 collection will present the module to all persons whose sex assigned at birth does not match  
400 their current gender.

401  
402 The findings of the current study provide insights for future directions. Namely, future research  
403 should expand on this work by identifying protective factors that can be potentially leveraged to  
404 buffer the impact of COVID-19 pandemic on gender-affirming resources, mental health, and  
405 economic stability. There is also a need to contextualize and understand how transgender and  
406 non-binary communities are currently responding to the economic instabilities due to the  
407 epidemic, particularly in regions where mandatory stay-at-home orders remain. These  
408 restrictions may have led or will lead some transgender and non-binary individuals to turn to  
409 more dangerous work for income, unregulated and unmonitored markets for gender-affirming  
410 services or goods, or the use of alcohol and other substances to cope. Lastly, given the mobile  
411 and online nature of recruitment for this study, researchers should look for feasibility and  
412 opportunity with Hornet and other mobile apps as a platform for outreach, programming, and  
413 interventions for transgender and non-binary communities in regions where the apps are  
414 utilized.

## 415 **CONCLUSION**

417 Along with these research implications, our findings suggest the need for multiple programmatic  
418 interventions specific to transgender and non-binary populations. Maintaining and increasing  
419 secure access to lifesaving gender-affirming resources, mental health services, and economic  
420 stability will require backing from both typical and atypical sources — from nonprofit  
421 organizations to for-profit companies to academic researchers — both during and after the  
422 COVID-19 pandemic. This could include, for example, instrumental support according to  
423 community needs (e.g., coordinating food bank deliveries or monetary support for bills) or  
424 resource mapping to help transgender and non-binary individuals identify where they can seek  
425 pandemic-related relief and aid without stigma or discrimination<sup>52</sup>. Health insurers and  
426 healthcare facilities could also transparently communicate changes in policies and logistics for  
427 gender-affirming services to alleviate anxieties around loss of access due to pandemic control  
428 measures. To prevent detrimental mental health consequences due to inaccessibility of gender-  
429 affirming resources and economic hardships, rapid policies (e.g., digital prescription refills) and  
430 flexible interventions (e.g., telehealth) are needed to maintain continuity of gender-affirming  
431 hormones as well as therapy and counseling. To achieve these interventions, innovative  
432 partnerships will be needed to reach the most marginalized— both by supporting trans-led,  
433 community-based organizations to maintain and expand their transgender health services as  
434 well as by increasing the capabilities of nation- and/or state-sponsored programs and private  
435 sector companies to better serve transgender and non-binary communities.

436 **Acknowledgements**

437 The authors thank the individuals who volunteered their valuable time to participate in our  
438 survey. The authors also thank the people who translated the survey from English into 13  
439 different languages: Ana Cara-Linda, Anna Yakusik, Carol Strong, Damiano Cerasuolo, Edward  
440 Sutanto, Ezgi Ayeser, Henrique Vicentim. Howie Lim, Ibu Ketty, Jose Garcia, Junming Wu,  
441 Ketty Rosenfeld, Luana Araujo, Mariano Ruiz, Maryam Motaghi, Maso, Omar Cherkaoui,  
442 Panyaphon Phiphatkunarnon, Pedro Moreno, Poyao Huang, Souad Orhan, Stephane Ku, Tanat  
443 Chinbunchorn, Teak Sowaprox, Top Medping, and Yalda Toofan.

444 **REFERENCES**

- 445 1. Dong, E., Du, H. & Gardner, L. An interactive web-based dashboard to track COVID-19 in  
446 real time. *Lancet Infect. Dis.* **20**, 533–534 (2020).
- 447 2. Hale, T. *et al.* Oxford COVID-19 Government Response Tracker. *Blavatnik School of*  
448 *Government* (2020).
- 449 3. Czeisler, M. É. *et al.* Mental Health, Substance Use, and Suicidal Ideation During the  
450 COVID-19 Pandemic — United States, June 24–30, 2020. *MMWR. Morb. Mortal. Wkly.*  
451 *Rep.* **69**, 1049–1057 (2020).
- 452 4. Salari, N. *et al.* Prevalence of stress, anxiety, depression among the general population  
453 during the COVID-19 pandemic: a systematic review and meta-analysis. *Global. Health*  
454 **16**, 57 (2020).
- 455 5. Ahmed, S. A. K. S. *et al.* Impact of the societal response to COVID-19 on access to  
456 healthcare for non-COVID-19 health issues in slum communities of Bangladesh, Kenya,  
457 Nigeria and Pakistan: results of pre-COVID and COVID-19 lockdown stakeholder  
458 engagements. *BMJ Glob. Heal.* **5**, e003042 (2020).
- 459 6. U.S. Centers for Disease Control and Prevention. Reduced Access to Care: Household  
460 Pulse Survey. *National Center for Health Statistics* (2020). Available at:  
461 <https://www.cdc.gov/nchs/covid19/pulse/reduced-access-to-care.htm>. (Accessed: 1st  
462 October 2020)
- 463 7. Rao, D., Kekwaletswe, T. C., Hosek, S., Martinez, J. & Rodriguez, F. Stigma and social  
464 barriers to medication adherence with urban youth living with HIV. *AIDS Care - Psychol.*  
465 *Socio-Medical Asp. AIDS/HIV* **19**, 28–33 (2007).
- 466 8. Ettman, C. K. *et al.* Prevalence of Depression Symptoms in US Adults Before and During  
467 the COVID-19 Pandemic. *JAMA Netw. Open* **3**, e2019686 (2020).
- 468 9. Niles, M. T. *et al.* The Early Food Insecurity Impacts of COVID-19. *Nutrients* **12**, 2096  
469 (2020).
- 470 10. Nicola, M. *et al.* The socio-economic implications of the coronavirus pandemic (COVID-  
471 19): A review. *Int. J. Surg.* **78**, 185–193 (2020).
- 472 11. Banthin, J., Simpson, M., Buettgens, M., Blumberg, L. J. & Wang, R. *Changes in Health*  
473 *Insurance Coverage Due to the COVID-19 Recession: Preliminary Estimates Using*  
474 *Microsimulation.* (2020).
- 475 12. Whittington, C., Hadfield, K. & Calderón, C. *The Lives & Livelihoods of Many in the*  
476 *LGBTQ Community are at Risk amidst the COVID-19 Crisis.* (2020).
- 477 13. Aldridge, R. W. *et al.* Black, Asian and Minority Ethnic groups in England are at increased  
478 risk of death from COVID-19: indirect standardisation of NHS mortality data. *Wellcome*  
479 *Open Res.* **5**, 88 (2020).
- 480 14. Bui, D. P. *et al.* Racial and Ethnic Disparities Among COVID-19 Cases in Workplace  
481 Outbreaks by Industry Sector — Utah, March 6–June 5, 2020. *MMWR. Morb. Mortal.*  
482 *Wkly. Rep.* **69**, 1133–1138 (2020).

- 483 15. Millett, G. A. *et al.* Assessing differential impacts of COVID-19 on black communities.  
484 *Ann. Epidemiol.* **47**, 37–44 (2020).
- 485 16. Santos, G.-M. *et al.* Economic, Mental Health, HIV Prevention and HIV Treatment  
486 Impacts of COVID-19 and the COVID-19 Response on a Global Sample of Cisgender  
487 Gay Men and Other Men Who Have Sex with Men. *AIDS Behav.* (2020).  
488 doi:10.1007/s10461-020-02969-0
- 489 17. Poteat, T. C., Reisner, S. L., Miller, M. & Wirtz, A. L. Letter to the Editor: Vulnerability to  
490 COVID-19-related Harms Among Transgender Women With and Without HIV Infection in  
491 the Eastern and Southern U.S. *JAIDS J. Acquir. Immune Defic. Syndr.* **Publish Ah**,  
492 (2020).
- 493 18. Reisner, S. L. *et al.* Global health burden and needs of transgender populations: a  
494 review. *Lancet* **388**, 412–436 (2016).
- 495 19. Newcomb, M. E. *et al.* High Burden of Mental Health Problems, Substance Use,  
496 Violence, and Related Psychosocial Factors in Transgender, Non-Binary, and Gender  
497 Diverse Youth and Young Adults. *Arch. Sex. Behav.* **49**, 645–659 (2020).
- 498 20. Casey, L. S. *et al.* Discrimination in the United States: Experiences of lesbian, gay,  
499 bisexual, transgender, and queer Americans. *Health Serv. Res.* **54**, 1454–1466 (2019).
- 500 21. Jarrett, B. A., Corbet, A. L., Gardner, I. H., Weinand, J. D. & Peitzmeier, S. M. Chest  
501 Binding and Care Seeking Among Transmasculine Adults: A Cross-Sectional Study.  
502 *Transgender Heal.* **3**, 170–178 (2018).
- 503 22. Peitzmeier, S. M. *et al.* “It Can Promote an Existential Crisis”: Factors Influencing Pap  
504 Test Acceptability and Utilization Among Transmasculine Individuals. *Qual. Health Res.*  
505 **27**, 2138–2149 (2017).
- 506 23. Wernick, J. A., Busa, S., Matouk, K., Nicholson, J. & Janssen, A. A Systematic Review of  
507 the Psychological Benefits of Gender-Affirming Surgery. *Urol. Clin. North Am.* **46**, 475–  
508 486 (2019).
- 509 24. Murad, M. H. *et al.* Hormonal therapy and sex reassignment: a systematic review and  
510 meta-analysis of quality of life and psychosocial outcomes. *Clin. Endocrinol. (Oxf)*. **72**,  
511 214–231 (2010).
- 512 25. Peitzmeier, S., Gardner, I., Weinand, J., Corbet, A. & Acevedo, K. Health impact of chest  
513 binding among transgender adults: a community-engaged, cross-sectional study. *Cult.*  
514 *Health Sex.* **19**, 64–75 (2017).
- 515 26. Valentine, S. E. & Shipherd, J. C. A systematic review of social stress and mental health  
516 among transgender and gender non-conforming people in the United States. *Clin.*  
517 *Psychol. Rev.* **66**, 24–38 (2018).
- 518 27. Herman, J. L. & O’Neill, K. *Vulnerabilities to COVID-19 among Transgender Adults in the*  
519 *U.S.* (2020).
- 520 28. Snow, A., Cerel, J., Loeffler, D. N. & Flaherty, C. Barriers to Mental Health Care for  
521 Transgender and Gender-Nonconforming Adults: A Systematic Literature Review. *Health*  
522 *Soc. Work* **44**, 149–155 (2019).



- 523 29. Koehler, A., Motmans, J., te Gueldenning, A. & Nieder, T. O. *The Impact of COVID-19 on*  
524 *Transgender Health in German Speaking Countries.*
- 525 30. Bränström, R. & Pachankis, J. E. Reduction in Mental Health Treatment Utilization  
526 Among Transgender Individuals After Gender-Affirming Surgeries: A Total Population  
527 Study. *Am. J. Psychiatry* **177**, 727–734 (2020).
- 528 31. Fish, J. N. *et al.* “I’m Kinda Stuck at Home With Unsupportive Parents Right Now”:  
529 LGBTQ Youths’ Experiences With COVID-19 and the Importance of Online Support. *J.*  
530 *Adolesc. Heal.* **67**, 450–452 (2020).
- 531 32. Perez-Brumer, A. & Silva-Santisteban, A. COVID-19 Policies can Perpetuate Violence  
532 Against Transgender Communities: Insights from Peru. *AIDS Behav.* **24**, 2477–2479  
533 (2020).
- 534 33. Cicero, E. C., Reisner, S. L., Merwin, E. I., Humphreys, J. C. & Silva, S. G. The health  
535 status of transgender and gender nonbinary adults in the United States. *PLoS One* **15**,  
536 e0228765 (2020).
- 537 34. Restar, A., Jin, H. & Operario, D. Gender-inclusive and gender-specific approaches in  
538 trans health research. *Transgender Heal.* (2020).
- 539 35. Kroenke, K., Spitzer, R. L., Williams, J. B. W. & Löwe, B. An Ultra-Brief Screening Scale  
540 for Anxiety and Depression: The PHQ–4. *Psychosomatics* **50**, 613–621 (2009).
- 541 36. StataCorp. Stata Statistical Software: Release 14. (2015).
- 542 37. Wang, Y. *et al.* Health care and mental health challenges for transgender individuals  
543 during the COVID-19 pandemic. *Lancet Diabetes Endocrinol.* **8**, 564–565 (2020).
- 544 38. Sevelius, J. M. Gender Affirmation: A Framework for Conceptualizing Risk Behavior  
545 Among Transgender Women of Color. *Sex Roles* **68**, 675–689 (2013).
- 546 39. Bouman, W. P., Davey, A., Meyer, C., Witcomb, G. L. & Arcelus, J. Predictors of  
547 psychological well-being among treatment seeking transgender individuals. *Sex. Relatsh.*  
548 *Ther.* 1–17 (2016). doi:10.1080/14681994.2016.1184754
- 549 40. Colizzi, M. & Costa, R. The effect of cross-sex hormonal treatment on gender dysphoria  
550 individuals’ mental health: a systematic review. *Neuropsychiatr. Dis. Treat.* **12**, 1953–  
551 1966 (2016).
- 552 41. Nguyen, H. B. *et al.* Gender-Affirming Hormone Use in Transgender Individuals: Impact  
553 on Behavioral Health and Cognition. *Curr. Psychiatry Rep.* **20**, 110 (2018).
- 554 42. Defreyne, J., Van de Bruaene, L. D. L., Rietzschel, E., Van Schuylenbergh, J. & T’Sjoen,  
555 G. G. R. Effects of Gender-Affirming Hormones on Lipid, Metabolic, and Cardiac  
556 Surrogate Blood Markers in Transgender Persons. *Clin. Chem.* **65**, 119–134 (2019).
- 557 43. van der Miesen, A. I. R., Raaijmakers, D. & van de Grift, T. C. “You Have to Wait a Little  
558 Longer”: Transgender (Mental) Health at Risk as a Consequence of Deferring Gender-  
559 Affirming Treatments During COVID-19. *Arch. Sex. Behav.* **49**, 1395–1399 (2020).
- 560 44. Morning Consult. *How COVID-19 is Impacting LGBTQ Youth.* (2020).

- 561 45. Cook, S. H., Sandfort, T. G. M., Nel, J. A. & Rich, E. P. Exploring the Relationship  
562 Between Gender Nonconformity and Mental Health Among Black South African Gay and  
563 Bisexual Men. *Arch. Sex. Behav.* **42**, 327–330 (2013).
- 564 46. Martin-Storey, A. & August, E. G. Harassment Due to Gender Nonconformity Mediates  
565 the Association Between Sexual Minority Identity and Depressive Symptoms. *J. Sex Res.*  
566 **53**, 85–97 (2016).
- 567 47. White Hughto, J. M., Reisner, S. L. & Pachankis, J. E. Transgender stigma and health: A  
568 critical review of stigma determinants, mechanisms, and interventions. *Soc. Sci. Med.*  
569 **147**, 222–231 (2015).
- 570 48. Gonzales, G., Loret de Mola, E., Gavulic, K. A., McKay, T. & Purcell, C. Mental Health  
571 Needs Among Lesbian, Gay, Bisexual, and Transgender College Students During the  
572 COVID-19 Pandemic. *J. Adolesc. Heal.* (2020). doi:10.1016/j.jadohealth.2020.08.006
- 573 49. Linnemayr, S. *et al.* Longitudinal Assessment of Changes in Mental and Sexual Health  
574 Outcomes Due to COVID-19 among Latinx Sexual Minority Men and Transgender  
575 Women. *JAIDS J. Acquir. Immune Defic. Syndr.* (2020).  
576 doi:10.1097/QAI.0000000000002507
- 577 50. United Nations. *United Nations Policy Brief: COVID-19 and the need for action on mental*  
578 *health.* (2020).
- 579 51. Moreno, C. *et al.* How mental health care should change as a consequence of the  
580 COVID-19 pandemic. *The Lancet Psychiatry* **7**, 813–824 (2020).
- 581 52. Sevelius, J. M. *et al.* Research with Marginalized Communities: Challenges to Continuity  
582 During the COVID-19 Pandemic. *AIDS Behav.* **24**, 2009–2012 (2020).
- 583 53. Motmans, J., Nieder, T. O. & Bouman, W. P. Transforming the paradigm of nonbinary  
584 transgender health: A field in transition. *Int. J. Transgenderism* **20**, 119–125 (2019).
- 585

586 **Table 1: Demographics for transgender and non-binary individuals from the COVID-19 Disparities Survey**  
 587 **distributed globally by the Hornet and Her apps between April 16 and August 3, 2020 (N=964)**  
 588

|                                                                  | Overall (%) <sup>a</sup> |
|------------------------------------------------------------------|--------------------------|
| <b>Self-Reported Transgender Identity</b>                        |                          |
| Transgender man                                                  | 95 (9.9%)                |
| Transgender woman                                                | 201 (20.9%)              |
| Non-binary (NB) only                                             | 594 (61.6%)              |
| NB transgender woman                                             | 17 (1.8%)                |
| NB transgender man                                               | 7 (0.7%)                 |
| NB, transgender woman, and transgender man                       | 2 (0.2%)                 |
| Transgender man and transgender woman                            | 7 (0.7%)                 |
| Man and woman                                                    | 41 (4.3%)                |
| <b>Researcher-Generated Gender Categories</b>                    |                          |
| Transmasculine (assigned female sex or intersex at birth)        | 37 (3.8%)                |
| Transfeminine (assigned male sex or intersex at birth)           | 283 (29.4%)              |
| Non-binary <sup>b</sup>                                          | 644 (66.8%)              |
| <b>World Health Organization Region</b>                          |                          |
| Europe                                                           | 451 (46.8%)              |
| South-East Asia                                                  | 242 (25.1%)              |
| Americas                                                         | 86 (8.9%)                |
| Eastern Mediterranean                                            | 85 (8.8%)                |
| Western Pacific                                                  | 40 (4.2%)                |
| Africa                                                           | 35 (3.6%)                |
| <b>Age</b>                                                       |                          |
| 18-29 years                                                      | 487 (50.5%)              |
| 30 - 39 years                                                    | 287 (29.8%)              |
| 40 - 49 years                                                    | 132 (13.7%)              |
| 50+ years                                                        | 58 (6.0%)                |
| <b>Socioeconomic Status</b>                                      |                          |
| Lower                                                            | 151 (15.7%)              |
| Lower Middle                                                     | 472 (49.0%)              |
| Upper middle                                                     | 290 (30.1%)              |
| Upper                                                            | 46 (4.8%)                |
| <b>Years of Education</b>                                        |                          |
| Less than 6 years                                                | 54 (5.6%)                |
| 6-12 years                                                       | 176 (18.3%)              |
| Some university, no degree                                       | 193 (20.0%)              |
| Trade school                                                     | 120 (12.5%)              |
| University degree or more                                        | 410 (42.6%)              |
| <b>Ethnic Minority</b>                                           |                          |
| Yes                                                              | 250 (26.0%)              |
| No                                                               | 493 (51.2%)              |
| Don't know / can't answer                                        | 211 (21.9%)              |
| <b>Immigrant</b>                                                 |                          |
| Yes                                                              | 143 (14.8%)              |
| No                                                               | 719 (74.6%)              |
| Not sure                                                         | 85 (8.8%)                |
| <b>COVID-19 Pandemic Environment</b>                             |                          |
| Ever lacked access to a mask                                     | 122 (12.7%)              |
| In a location that ever issued "stay-at-home" confinement orders | 729 (75.6%)              |

medRxiv preprint doi: <https://doi.org/10.1101/2020.11.02.20224709>; this version posted November 4, 2020. The copyright holder for this preprint (which was not certified by peer review) is the author/funder, who has granted medRxiv a license to display the preprint in perpetuity. It is made available under a [CC-BY-NC-ND 4.0 International license](https://creativecommons.org/licenses/by-nc-nd/4.0/).

<sup>a</sup> Denominators include those for whom data were missing: 25 did not report a country, 5 did not report a socioeconomic status, 11 did not report an education level, 10 did not report if they were an ethnic minority, 17 did not report if they were an immigrant, 6 did not report their access to masks, and 7 did not report whether their country of residence had implemented "stay-at-home" confinement orders

<sup>b</sup> Of those whose gender was non-binary, 28 reported being assigned female sex at birth, 578 reported being assigned male sex at birth, 37 reported being assigned intersex at birth, and one did not report their sex assigned at birth.

590  
591  
592

**Table 2: Access to and actualization of gender-affirming resources among self-identified transgender and non-binary individuals from the COVID-19 Disparities Survey between April 16, 2020 and August 3, 2020 (N=964)**

|                                                                                                   | Overall (%)          | Transmasculine     | Transfeminine        | Non-Binary           | p-value <sup>b</sup> |
|---------------------------------------------------------------------------------------------------|----------------------|--------------------|----------------------|----------------------|----------------------|
| <b>Experienced reduced access to one or more gender-affirming resource below<sup>a</sup></b>      | 320 / 582<br>(55.0%) | 17 / 26<br>(65.4%) | 110 / 189<br>(58.2%) | 193 / 367<br>(52.6%) | 0.25                 |
| Hormone therapy and/or gender-affirming medication                                                | 143 / 401<br>(35.7%) | 11 / 20<br>(55.0%) | 61 / 145<br>(42.1%)  | 71 / 236<br>(30.1%)  | 0.01                 |
| Surgical aftercare                                                                                | 119 / 356<br>(33.4%) | 6 / 14<br>(42.9%)  | 51 / 127<br>(40.2%)  | 62 / 215<br>(28.8%)  | 0.08                 |
| Cosmetic supplies and services, e.g., makeup, wigs, and hair removal                              | 189 / 500<br>(37.8%) | 9 / 21<br>(42.9%)  | 65 / 162<br>(40.1%)  | 115 / 317<br>(36.3%) | 0.63                 |
| Mental health counseling and therapy*                                                             | 192 / 448<br>(42.9%) | 13 / 21<br>(61.9%) | 57 / 143<br>(39.9%)  | 122 / 284<br>(43.0%) | 0.16                 |
| Body modifiers, e.g., binders and packing material                                                | 160 / 443<br>(36.1%) | 8 / 18<br>(44.4%)  | 57 / 148<br>(38.5%)  | 95 / 277<br>(34.3%)  | 0.52                 |
| <b>Compared to before the COVID-19 pandemic, how often able to live according to their gender</b> |                      |                    |                      |                      |                      |
| More or a lot more                                                                                | 67 / 860<br>(7.8%)   | 7 / 28<br>(25.0%)  | 22 / 232<br>(9.5%)   | 38 / 600<br>(7.1%)   | < 0.001              |
| About the same                                                                                    | 466<br>(54.2%)       | 13<br>(46.4%)      | 110<br>(47.4%)       | 343<br>(57.2%)       |                      |
| Less or not at all                                                                                | 327<br>(38.0%)       | 8<br>(28.6%)       | 100<br>(43.1%)       | 219<br>(36.5%)       |                      |

medRxiv preprint doi: <https://doi.org/10.1101/2020.11.02.20224709>; this version posted November 16, 2020. The copyright holder for this preprint (which was not certified by peer review) is the author/funder, who has granted medRxiv a license to display the preprint in perpetuity. It is made available under a [CC-BY-NC-ND 4.0 International license](https://creativecommons.org/licenses/by-nc-nd/4.0/).

<sup>a</sup> Denominators excluded participants who were not presented with these questions, did not respond, or said that the resource was not applicable to them  
<sup>b</sup> p-values were calculated using chi-squared and Fischer's exact tests as appropriate

593  
594

595 **Table 3: Mental health and resiliency indicators among transgender and non-binary individuals from the**  
 596 **COVID-19 Disparities Survey between April 16, 2020 and August 3, 2020 (N=964)<sup>a</sup>**  
 597

|                                                                                               | Overall (%)          | Transmasculine     | Transfeminine        | Non-Binary           | p-value <sup>b</sup> |
|-----------------------------------------------------------------------------------------------|----------------------|--------------------|----------------------|----------------------|----------------------|
| <b>Screened positive (PHQ-4 ≥3)</b>                                                           |                      |                    |                      |                      |                      |
| Depression                                                                                    | 442 / 877<br>(50.4%) | 17 / 35<br>(48.6%) | 144 / 245<br>(58.8%) | 281 / 597<br>(47.1%) | 0.01                 |
| Anxiety                                                                                       | 392 / 856<br>(45.8%) | 17 / 33<br>(51.5%) | 125 / 237<br>(52.7%) | 250 / 586<br>(42.7%) | 0.03                 |
| <b>Felt lonely since COVID-19 began</b>                                                       |                      |                    |                      |                      |                      |
| Yes                                                                                           | 685 / 957<br>(71.6%) | 28 / 37<br>(75.7%) | 216 / 281<br>(76.9%) | 441 / 639<br>(69.0%) | 0.04                 |
| <b>Frequency of suicidal ideation since COVID-19 vs. 6 months prior</b>                       |                      |                    |                      |                      |                      |
| Was and remains rare                                                                          | 648 / 928<br>(69.8%) | 26 / 36<br>(72.2%) | 183 / 268<br>(68.3%) | 439 / 624<br>(70.4%) | 0.98                 |
| Decreased from frequent to rare                                                               | 116<br>(12.5%)       | 4<br>(11.1%)       | 33<br>(12.3%)        | 79<br>(12.7%)        |                      |
| Increased from rare to frequent                                                               | 93<br>(10.0%)        | 3<br>(8.3%)        | 31<br>(11.6%)        | 59<br>(9.5%)         |                      |
| Was and remains frequent                                                                      | 71<br>(7.6%)         | 3<br>(8.3%)        | 21<br>(7.8%)         | 47<br>(7.5%)         |                      |
| <b>Reported having sources of hope, strength, comfort, and peace</b>                          |                      |                    |                      |                      |                      |
| Yes                                                                                           | 489 / 768<br>(63.7%) | 22 / 31<br>(71.0%) | 100 / 209<br>(47.9%) | 367 / 528<br>(69.5%) | < 0.001              |
| <b>Reported being intent on finding emotional support and therapy</b>                         |                      |                    |                      |                      |                      |
| Agree                                                                                         | 467 / 851<br>(54.9%) | 20 / 35<br>(57.1%) | 129 / 237<br>(54.4%) | 318 / 579<br>(54.9%) | 0.85                 |
| Disagree                                                                                      | 136<br>(16.0%)       | 5<br>(14.3%)       | 43<br>(18.1%)        | 88<br>(15.2%)        |                      |
| <b>Reported believing they could live a happy, full life despite the pandemic<sup>c</sup></b> |                      |                    |                      |                      |                      |
| Agree                                                                                         | 516 / 847<br>(60.9%) | 26 / 34<br>(76.5%) | 137 / 231<br>(59.3%) | 353 / 582<br>(60.6%) | 0.22                 |
| Disagree                                                                                      | 120<br>(14.2%)       | 2<br>(5.9%)        | 40<br>(17.3%)        | 78<br>(13.4%)        |                      |

medRxiv preprint doi: <https://doi.org/10.1101/2020.11.02.20224709>; this version posted November 4, 2020. The copyright holder for this preprint (which was not certified by peer review) is the author/funder, who has granted medRxiv a license to display the preprint in perpetuity. It is made available under a [CC-BY-NC-ND 4.0 International license](https://creativecommons.org/licenses/by-nc-nd/4.0/).

<sup>a</sup> Denominators excluded individuals who did not respond or reported not knowing their answer unless otherwise noted

<sup>b</sup> p-values were calculated using chi-squared and Fischer's exact tests as appropriate

<sup>c</sup> Denominator includes those who stated "neither agree nor disagree"

598

599

600 **Table 4: Economic indicators among transgender and non-binary individuals from the COVID-19 Disparities Survey**  
 601 **between April 16, 2020 and August 3, 2020 (N=964)<sup>a</sup>**  
 602

|                                                                 | Overall (%)          | Transmasculine     | Transfeminine        | Non-Binary           | p-value <sup>b</sup> |
|-----------------------------------------------------------------|----------------------|--------------------|----------------------|----------------------|----------------------|
| <b>Lost job due to COVID-19</b>                                 | 151 / 953<br>(15.8%) | 5 / 37<br>(13.5%)  | 53 / 278<br>(19.1%)  | 93 / 638<br>(14.6%)  | 0.21                 |
| <b>Expected reduction in income</b>                             |                      |                    |                      |                      |                      |
| 0%                                                              | 216 / 940<br>(23.0%) | 13 / 37<br>(35.1%) | 57 / 270<br>(21.1%)  | 10 / 633<br>(23.1%)  | 0.33                 |
| 1-39%                                                           | 265<br>(28.2%)       | 11<br>(29.7%)      | 70<br>(25.9%)        | 184<br>(29.1%)       |                      |
| 40-99%                                                          | 337<br>(35.8%)       | 9<br>(24.3%)       | 101<br>(37.4%)       | 227<br>(35.9%)       |                      |
| 100%                                                            | 122<br>(13.0%)       | 4<br>(10.8%)       | 42<br>(15.6%)        | 76<br>(12.0%)        |                      |
| <b>Expected to lose health insurance<sup>c</sup></b>            |                      |                    |                      |                      |                      |
| Yes                                                             | 112 / 659<br>(17.0%) | 7 / 23<br>(30.4%)  | 40 / 179<br>(22.4%)  | 65 / 457<br>(14.2%)  | 0.05                 |
| No                                                              | 408<br>(61.9%)       | 11<br>(47.8%)      | 104<br>(58.1%)       | 293<br>(64.1%)       |                      |
| <b>Financial Aid</b>                                            |                      |                    |                      |                      |                      |
| Received and not needed                                         | 22 / 801<br>(2.8%)   | 3 / 30<br>(10.0%)  | 8 / 229<br>(3.5%)    | 11 / 542<br>(2.0%)   | 0.08                 |
| Not received but not needed                                     | 159<br>(19.8%)       | 9<br>(36.0%)       | 37<br>(16.2%)        | 113<br>(20.8%)       |                      |
| Received and needed                                             | 192<br>(24.0%)       | 5<br>(16.7%)       | 56<br>(24.4%)        | 131<br>(24.2%)       |                      |
| Not received and needed                                         | 428<br>(53.4%)       | 13<br>(43.3%)      | 128<br>(55.9%)       | 287<br>(53.0%)       |                      |
| <b>Had cut or reduced meals</b>                                 | 361 / 900<br>(40.1%) | 18 / 35<br>(51.4%) | 131 / 258<br>(50.8%) | 212 / 607<br>(34.9%) | < 0.001              |
| <b>Among those employed, ability to miss work</b>               |                      |                    |                      |                      |                      |
| Was telecommuting or on paid leave                              | 163 / 473<br>(34.5%) | 8 / 23<br>(34.8%)  | 32 / 128<br>(25.0%)  | 123 / 322<br>(38.2%) | 0.06                 |
| Cannot afford to miss work but was following confinement orders | 146<br>(30.9%)       | 7<br>(30.4%)       | 40<br>(31.2%)        | 99<br>(30.8%)        |                      |
| Cannot afford to stay home and must work to survive             | 164<br>(34.7%)       | 8<br>(34.8%)       | 56<br>(43.8%)        | 100<br>(31.1%)       |                      |

medRxiv preprint doi: <https://doi.org/10.1101/2020.11.19.2024709>; this version posted November 4, 2020. The copyright holder for this preprint (which was not certified by peer review) is the author/funder, who has granted medRxiv a license to display the preprint in perpetuity. It is made available under a [CC-BY-NC-ND 4.0 International license](https://creativecommons.org/licenses/by-nc-nd/4.0/).

<sup>a</sup> Denominators excluded individuals who did not respond or reported not knowing their answer unless otherwise noted

<sup>b</sup> p-values were calculated using chi-squared and Fischer's exact tests as appropriate

<sup>c</sup> Denominator includes those who reported they "might or might not" lose their health insurance

603

604

605 **Table 5: Bivariate prevalence ratios of screening positive for depression, screening positive for anxiety, and changes in**  
 606 **suicidal ideation among transgender and non-binary individuals from the COVID-19 Disparities Survey between April 16,**  
 607 **2020 and August 3, 2020**  
 608

|                                                                                 | Screening positive for depression<br>PrR (95% CI) <sup>a</sup> | Screening positive for anxiety<br>PrR (95% CI) | Increased frequency of suicidal thoughts<br>(vs. remained low) <sup>b</sup> | Retained frequent suicidal thoughts<br>(vs. reduced frequency) <sup>c</sup> |
|---------------------------------------------------------------------------------|----------------------------------------------------------------|------------------------------------------------|-----------------------------------------------------------------------------|-----------------------------------------------------------------------------|
| Reported reduction in access to more than one (vs. 0) gender affirming resource | 1.63 (1.36, 1.97)<br>n = 532                                   | 1.61 (1.31, 1.97)<br>n = 523                   | 1.74 (1.07, 2.82)<br>n = 449                                                | 1.37 (0.87, 2.15)<br>n = 112                                                |
| Reported decreased time (vs. increased) lived according to one's gender         | 1.21 (0.92, 1.58)<br>n = 346                                   | 1.48 (1.04, 2.10)<br>n = 331                   | 0.57 (0.33, 0.98)<br>n = 310                                                | 1.12 (0.50, 2.54)<br>n = 68                                                 |

<sup>a</sup> Prevalence ratio (PrR) and 95% confidence interval (95% CI)

<sup>b</sup> Among individuals who reported never or seldom having suicidal ideation in the six months prior to the pandemic beginning

<sup>c</sup> Among individuals who reported having suicidal ideation quite often, very often, and all the time in the six months prior to the pandemic beginning

609

610 **SUPPORTING INFORMATION**

611 **S1 Table. Access to and actualization of gender-affirming resources among self-identified transgender and non-binary**  
 612 **individuals who participated in the COVID-19 Disparities Survey, stratified by country (April 16 – August 3, 2020, N=964)**  
 613

|                                                                                                   | European Region   | South-East Asia Region | Region of the Americas | Eastern Mediterranean Region | Western Pacific Region | African Region  | p-value <sup>a</sup> |
|---------------------------------------------------------------------------------------------------|-------------------|------------------------|------------------------|------------------------------|------------------------|-----------------|----------------------|
| <b>Experienced reduced access to one or more gender affirming resource below<sup>b</sup></b>      | 116 / 207 (56.0%) | 109 / 204 (53.4%)      | 32 / 53 (60.4%)        | 30 / 56 (53.6%)              | 6 / 25 (24.0%)         | 15 / 23 (65.2%) | 0.043                |
| Hormone therapy and/or gender affirming medication                                                | 47 / 116 (40.5%)  | 55 / 186 (29.6%)       | 10 / 25 (40.0%)        | 11 / 32 (34.4%)              | 4 / 19 (21.1%)         | 8 / 13 (61.5%)  | 0.081                |
| Surgical aftercare                                                                                | 37 / 93 (39.8%)   | 51 / 175 (29.1%)       | 7 / 15 (46.7%)         | 8 / 33 (24.2%)               | 2 / 18 (11.1%)         | 8 / 12 (66.7%)  | 0.008                |
| Cosmetic supplies and services, e.g., makeup, wigs, and hair removal                              | 68 / 176 (38.6%)  | 62 / 181 (34.3%)       | 21 / 46 (45.7%)        | 21 / 47 (44.7%)              | 3 / 23 (13.0%)         | 9 / 15 (60.0%)  | 0.025                |
| Mental health counseling and therapy*                                                             | 62 / 128 (48.4%)  | 73 / 186 (39.2%)       | 25 / 42 (59.5%)        | 12 / 42 (28.6%)              | 3 / 19 (15.8%)         | 9 / 18 (50.0%)  | 0.004                |
| Body modifiers, e.g., binders and packing material                                                | 56 / 134 (41.8%)  | 58 / 179 (32.4%)       | 17 / 40 (42.5%)        | 14 / 46 (30.4%)              | 3 / 21 (14.3%)         | 8 / 13 (61.5%)  | 0.030                |
| <b>Compared to before the COVID-19 pandemic, how often able to live according to their gender</b> |                   |                        |                        |                              |                        |                 |                      |
| More or a lot more                                                                                | 25 / 381 (6.6%)   | 20 / 236 (8.5%)        | 7 / 84 (8.3%)          | 6 / 71 (8.5%)                | 0 / 34 (0.0%)          | 6 / 33 (18.2%)  | 0.000                |
| About the same                                                                                    | 181 (47.5%)       | 156 (66.1%)            | 53 (63.1%)             | 26 (36.6%)                   | 24 (70.6%)             | 13 (39.4%)      |                      |
| Less or not at all                                                                                | 175 (45.9%)       | 60 (25.4%)             | 24 (28.6%)             | 39 (54.9%)                   | 10 (29.4%)             | 14 (42.4%)      |                      |

medRxiv preprint doi: <https://doi.org/10.1101/2020.11.02.20247999>; this version posted November 24, 2020. The copyright holder for this preprint (which was not certified by peer review) is the author/funder, who has granted medRxiv a license to display the preprint in perpetuity. It is made available under a [CC-BY-NC-ND 4.0 International license](https://creativecommons.org/licenses/by-nc-nd/4.0/).

614 <sup>a</sup> p-values were calculated using chi-squared and Fischer's exact tests as appropriate  
 615 <sup>b</sup> Denominators excluded participants who were not presented with these questions, did not respond, or said that the resource was not applicable to them  
 616



617 **S2 Table. Mental health and resiliency indicators among transgender and non-binary individuals who participated in the**  
 618 **COVID-19 Disparities Survey, stratified by country (April 16 – August 3, 2020, N=964<sup>a</sup>)**

|                                                                                               | European Region      | South-East Asia Region | Region of the Americas | Eastern Mediterranean Region | Western Pacific Region | African Region       | p-value <sup>b</sup> |
|-----------------------------------------------------------------------------------------------|----------------------|------------------------|------------------------|------------------------------|------------------------|----------------------|----------------------|
| <b>Screened positive per PHQ-4 (score ≥3)</b>                                                 |                      |                        |                        |                              |                        |                      |                      |
| Depression                                                                                    | 232 / 400<br>(58.0%) | 66 / 222<br>(29.7%)    | 46 / 82<br>(56.1%)     | 48 / 76<br>(63.2%)           | 21 / 40<br>(52.5%)     | 18 / 32<br>(56.3%)   | ≤ 0.001              |
| Anxiety                                                                                       | 392 / 856<br>(45.8%) | 392 / 856<br>(45.8%)   | 392 / 856<br>(45.8%)   | 392 / 856<br>(45.8%)         | 392 / 856<br>(45.8%)   | 392 / 856<br>(45.8%) | ≤ 0.001              |
| <b>Felt lonely since COVID-19 began</b>                                                       |                      |                        |                        |                              |                        |                      |                      |
| Yes                                                                                           | 685 / 957<br>(71.6%) | 685 / 957<br>(71.6%)   | 685 / 957<br>(71.6%)   | 685 / 957<br>(71.6%)         | 685 / 957<br>(71.6%)   | 685 / 957<br>(71.6%) | 0.063                |
| <b>Frequency of suicidal ideation since COVID-19 vs. 6 months prior</b>                       |                      |                        |                        |                              |                        |                      |                      |
| Was and remains rare                                                                          | 648 / 928<br>(69.8%) | 648 / 928<br>(69.8%)   | 648 / 928<br>(69.8%)   | 648 / 928<br>(69.8%)         | 648 / 928<br>(69.8%)   | 648 / 928<br>(69.8%) | 0.020                |
| Decreased from frequent to rare                                                               | 116<br>(12.5%)       | 116<br>(12.5%)         | 116<br>(12.5%)         | 116<br>(12.5%)               | 116<br>(12.5%)         | 116<br>(12.5%)       |                      |
| Increased from rare to frequent                                                               | 93<br>(10.0%)        | 93<br>(10.0%)          | 93<br>(10.0%)          | 93<br>(10.0%)                | 93<br>(10.0%)          | 93<br>(10.0%)        |                      |
| Was and remains frequent                                                                      | 71<br>(7.6%)         | 71<br>(7.6%)           | 71<br>(7.6%)           | 71<br>(7.6%)                 | 71<br>(7.6%)           | 71<br>(7.6%)         |                      |
| <b>Reported having sources of hope, strength, comfort, and peace</b>                          |                      |                        |                        |                              |                        |                      |                      |
| Yes                                                                                           | 489 / 768<br>(63.7%) | 489 / 768<br>(63.7%)   | 489 / 768<br>(63.7%)   | 489 / 768<br>(63.7%)         | 489 / 768<br>(63.7%)   | 489 / 768<br>(63.7%) | ≤ 0.001              |
| <b>Reported being intent on finding emotional support and therapy<sup>c</sup></b>             |                      |                        |                        |                              |                        |                      |                      |
| Agree                                                                                         | 467 / 851<br>(54.9%) | 467 / 851<br>(54.9%)   | 467 / 851<br>(54.9%)   | 467 / 851<br>(54.9%)         | 467 / 851<br>(54.9%)   | 467 / 851<br>(54.9%) | ≤ 0.001              |
| Disagree                                                                                      | 136<br>(16.0%)       | 136<br>(16.0%)         | 136<br>(16.0%)         | 136<br>(16.0%)               | 136<br>(16.0%)         | 136<br>(16.0%)       |                      |
| <b>Reported believing they could live a happy, full life despite the pandemic<sup>c</sup></b> |                      |                        |                        |                              |                        |                      |                      |
| Agree                                                                                         | 516 / 847<br>(60.9%) | 516 / 847<br>(60.9%)   | 516 / 847<br>(60.9%)   | 516 / 847<br>(60.9%)         | 516 / 847<br>(60.9%)   | 516 / 847<br>(60.9%) | ≤ 0.001              |
| Disagree                                                                                      | 120<br>(14.2%)       | 120<br>(14.2%)         | 120<br>(14.2%)         | 120<br>(14.2%)               | 120<br>(14.2%)         | 120<br>(14.2%)       |                      |

medRxiv preprint doi: <https://doi.org/10.1101/2020.11.02.20224709>; this version posted November 4, 2020. The copyright holder for this preprint (which was not certified by peer review) is the author/funder, who has granted medRxiv a license to display the preprint in perpetuity. It is made available under a [CC-BY-NC-ND 4.0 International license](https://creativecommons.org/licenses/by-nc-nd/4.0/).

<sup>a</sup> Denominators excluded individuals who did not respond or reported not knowing their answer unless otherwise noted  
<sup>b</sup> p-values were calculated using chi-squared and Fischer's exact tests as appropriate  
<sup>c</sup> Denominator includes those who stated "neither agree nor disagree"

619  
620  
621  
622

623  
624  
625

**S3 Table: Socioeconomic indicators among transgender and non-binary individuals who participated in the COVID-19 Disparities Survey, stratified by country (April 16 – August 3, 2020, N=964)<sup>a</sup>**

|                                                                 | European Region      | South-East Asia Region | Region of the Americas | Eastern Mediterranean Region | Western Pacific Region | African Region     | p-value <sup>b</sup> |
|-----------------------------------------------------------------|----------------------|------------------------|------------------------|------------------------------|------------------------|--------------------|----------------------|
| <b>Lost job due to COVID-19</b>                                 | 74 / 446<br>(16.6%)  | 38 / 238<br>(16.0%)    | 13 / 86<br>(15.1%)     | 15 / 83<br>(18.1%)           | 5 / 40<br>(12.5%)      | 2 / 35<br>(5.7%)   | 0.614                |
| <b>Expected reduction in income</b>                             |                      |                        |                        |                              |                        |                    |                      |
| 0%                                                              | 113 / 436<br>(25.9%) | 39 / 340<br>(16.3%)    | 25 / 86<br>(29.1%)     | 19 / 79<br>(24.1%)           | 9 / 40<br>(22.5%)      | 9 / 35<br>(25.7%)  | 0.055                |
| 1-39%                                                           | 123<br>(28.2%)       | 66<br>(27.5%)          | 20<br>(23.3%)          | 20<br>(25.3%)                | 14<br>(35.0%)          | 11<br>(31.4%)      |                      |
| 40-99%                                                          | 140<br>(32.1%)       | 110<br>(45.8%)         | 34<br>(39.5%)          | 25<br>(31.7%)                | 13<br>(32.5%)          | 10<br>(28.6%)      |                      |
| 100%                                                            | 60<br>(13.8%)        | 25<br>(10.4%)          | 7<br>(8.1%)            | 15<br>(19.0%)                | 4<br>(10.0%)           | 5<br>(14.3%)       |                      |
| <b>Expected to lose health insurance<sup>c</sup></b>            |                      |                        |                        |                              |                        |                    |                      |
| Yes                                                             | 32 / 307<br>(10.4%)  | 42 / 165<br>(25.5%)    | 11 / 67<br>(16.4%)     | 16 / 51<br>(31.4%)           | 7 / 35<br>(20.0%)      | 1 / 21<br>(4.8%)   | < 0.001              |
| No                                                              | 203<br>(66.1%)       | 94<br>(57.0%)          | 48<br>(71.6%)          | 27<br>(52.9%)                | 18<br>(51.4%)          | 12<br>(57.1%)      |                      |
| <b>Receipt and need of financial aid</b>                        |                      |                        |                        |                              |                        |                    |                      |
| Received and not needed                                         | 2 / 75<br>(2.7%)     | 6 / 208<br>(2.9%)      | 2 / 75<br>(2.7%)       | 3 / 64<br>(4.7%)             | 0 / 32<br>(0.0%)       | 0 / 30<br>(0.0%)   | <0.001               |
| Not received but not needed                                     | 86<br>(22.9%)        | 29<br>(13.9%)          | 19<br>(25.3%)          | 13<br>(20.3%)                | 6<br>(18.8%)           | 5<br>(16.7%)       |                      |
| Received and needed                                             | 53<br>(14.1%)        | 92<br>(44.2%)          | 23<br>(30.7%)          | 8<br>(12.5%)                 | 8<br>(25.0%)           | 5<br>(16.7%)       |                      |
| Not received and needed                                         | 226<br>(60.3%)       | 81<br>(38.9%)          | 31<br>(41.3%)          | 40<br>(62.5%)                | 18<br>(56.3%)          | 20<br>(66.7%)      |                      |
| <b>Had cut or reduced meals</b>                                 | 167 / 420<br>(39.8%) | 82 / 230<br>(35.7%)    | 28 / 82<br>(34.2%)     | 45 / 75<br>(60.0%)           | 12 / 37<br>(32.4%)     | 16 / 34<br>(47.1%) | 0.004                |
| <b>Among those employed, ability to miss work</b>               |                      |                        |                        |                              |                        |                    |                      |
| Was telecommuting or on paid leave                              | 81 / 214<br>(37.9%)  | 40 / 127<br>(31.5%)    | 17 / 42<br>(40.5%)     | 11 / 34<br>(32.4%)           | 6 / 21<br>(28.6%)      | 6 / 20<br>(30.0%)  | 0.165                |
| Cannot afford to miss work but was following confinement orders | 72<br>(33.6%)        | 34<br>(26.8%)          | 9<br>(21.4%)           | 9<br>(26.5%)                 | 5<br>(23.8%)           | 10<br>(50.0%)      |                      |
| Cannot afford to stay home and must work to survive             | 61<br>(28.5%)        | 53<br>(41.7%)          | 16<br>(38.1%)          | 14<br>(41.2%)                | 10<br>(47.6%)          | 4<br>(20.0%)       |                      |

medRxiv preprint doi: <https://doi.org/10.1101/2020.11.02.20224709>; this version posted November 4, 2020. The copyright holder for this preprint (which was not certified by peer review) is the author/funder, who has granted medRxiv a license to display the preprint in perpetuity. It is made available under a CC-BY-NC 4.0 International license.

<sup>a</sup> Denominators excluded individuals who did not respond or reported not knowing their answer unless otherwise noted  
<sup>b</sup> p-values were calculated using chi-squared and Fischer's exact tests as appropriate  
<sup>c</sup> Denominator includes those who reported they "might or might not" lose their health insurance

627  
628  
629  
630  
631
